# Supplementary material
Source: HighWire-hosted journal article supplement (https://militaryhealth.bmj.com/content/169/2/127)
Supplement: inline-supplementary-material-1 [file inline-supplementary-material-1.pdf]

## Supplementary Information

### Keywords used for searches

- blast injury
- blast protection
- landmine
- explosive injury
- landmine injury
- explosive remnants of war
- grenade injury
- bomb
- improvised explosive device
- blast armour

### List of Funders

| Funder                                                | Country        | Number of Awards |
|-------------------------------------------------------|----------------|------------------|
| CDC                                                   | United States  | 3                |
| National Agency for Research                          | France         | 2                |
| UKRI                                                  | United Kingdom | 5                |
| DoD                                                   | United States  | 501              |
| HRA                                                   | United States  | 1                |
| NIH                                                   | United States  | 70               |
| Saskatchewan Health Research Foundation               | Canada         | 1                |
| NASA                                                  | United States  | 1                |
| NSF                                                   | United States  | 13               |
| Canadian Institutes of Health Research                | Canada         | 5                |
| Center for Neuroscience and Regenerative Medicine     | United States  | 31               |
| Citizens United for Research in Epilepsy              | United States  | 1                |
| Danish Ministry of Higher Education and Science       | Denmark        | 1                |
| German Research Foundation                            | Germany        | 1                |
| Japan Society for the Promotion of Science            | Japan          | 67               |
| National Natural Science Foundation of China          | China          | 5                |
| National Research Foundation                          | South Africa   | 1                |
| Natural Sciences and Engineering Research Council     | Canada         | 2                |
| United States Food and Drug Administration            | United States  | 1                |
| VINNOVA                                               | Sweden         | 2                |
| United States Department of Health and Human Services | United States  | 1                |
| United States Department of Veterans Affairs          | United States  | 92               |
| NIHR                                                  | United Kingdom | 2                |
| Dstl                                                  | United Kingdom | 16               |
| <b>Total</b>                                          |                | <b>827</b>       |

### Summary of Unavailable Funding Information

| Funder                                     | Country       | Number of Awards |
|--------------------------------------------|---------------|------------------|
| DoD                                        | United States | 28               |
| National Research Foundation               | South Africa  | 1                |
| NIH                                        | United States | 1                |
| United States Food and Drug Administration | United States | 1                |

### Definitions & Award Labels

#### Research

Our analysis considered only research awards related to blast injury science, and excluded (for example) purely implementation projects.

In order to keep our analysis as straightforward as possible, our definition of research was an award that involved ‘the creation of new knowledge and/or the use of existing knowledge in a new and creative way so as to generate new concepts, methodologies and understandings.’ This is a definition used by universities, for example

[https://www.westernsydney.edu.au/research/researchers/preparing\\_a\\_grant\\_application/dest\\_definition\\_of\\_research](https://www.westernsydney.edu.au/research/researchers/preparing_a_grant_application/dest_definition_of_research)

Thus, to further clarify around the boundaries between research and implementation, any award that implements the findings of research was excluded. Any award that considered how best to assess and incorporate new approaches into a health system was classified as research. We are happy to respond to individual requests for clarity about our inclusion and exclusion criteria.

#### Type of Science Definitions

- Pre-clinical – molecular, in vitro, in vivo, immunology, drug discovery
- Phase 1-3 Clinical trials – includes RCTs, ‘first-in-man’ studies etc.
- Product Development – Phase IV, product roll out, pharmacovigilance
- Public Health – epidemiology, statistics, economics, social science, behavioural studies, population health, implementation research
- Cross-disciplinary – any project with significant components that encompass two of the above types of science e.g. pre-clinical research leading into a phase I trial

#### Award Labels

##### Blast injury health area categories:

- Brain Injury
- Cancer
- Ear Injury
- Eye Injury
- Haemorrhage
- Head Injury
- Infection
- Lung Injury
- Nerve Damage
- Orthopaedic Injury

- Other
- Poly-trauma
- Radiation Injury
- Skin Injury
- N/A

### Notes on Health Area Categories

Cancer - relates to research investigating cancers resulting from blast radiation. This clarification has been added to the revised manuscript in the Methods section, see paragraph 6, page 4.

N/A – is where there was no particular health/injury area of focus of the award but the award was in the remit of human blast injuries.

Other – includes very specific health areas that are only covered by limited numbers of awards and are not the main health areas focused on in blast injury research. E.g. awards focussed on liver damage, kidney damage, penile injury.

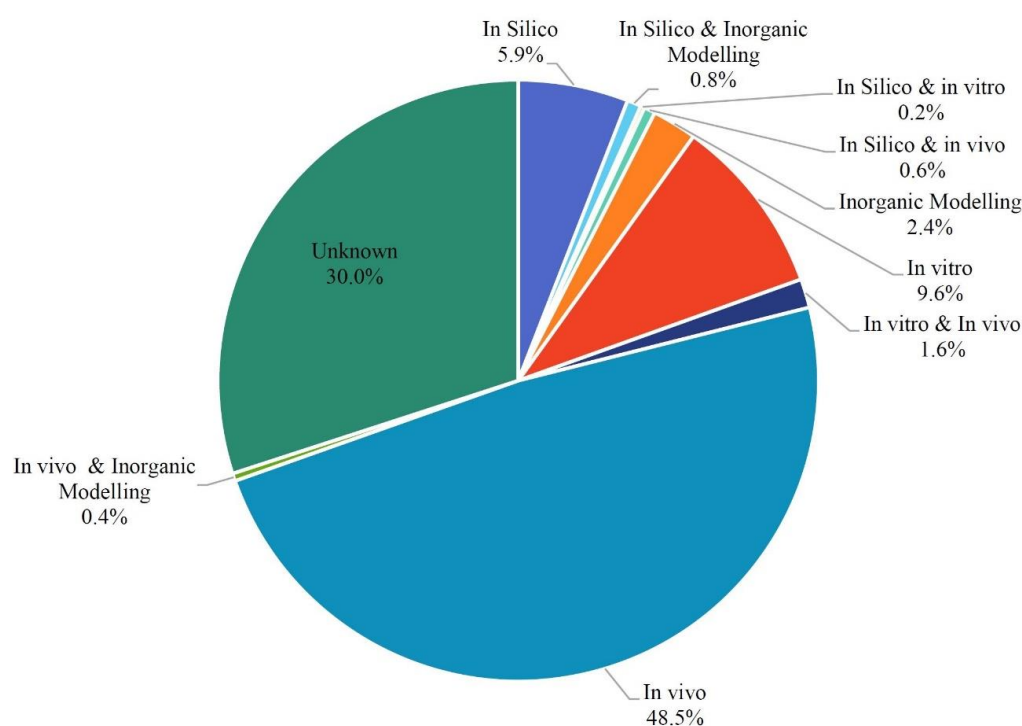

**Figure A:** Pre-clinical methodologies adopted in blast TBI research.

### More on the RESIN study

The methods used in this study are similar to those used in other Research Investments in Global Health study (RESIN). For more information on the RESIN study, see the Clinical Informatics Research Unit website at <https://www.the-ciru.com/resin>
